# Detecting Remote Sequence Homology in Disordered Proteins: Discovery of Conserved Motifs in the N-Termini of *Mononegavirales* phosphoproteins

David Karlin\*, Robert Belshaw

Department of Zoology, University of Oxford, Oxford, United Kingdom

## Abstract

*Paramyxovirinae* are a large group of viruses that includes *measles virus* and *parainfluenza viruses*. The viral Phosphoprotein (P) plays a central role in viral replication. It is composed of a highly variable, disordered N-terminus and a conserved C-terminus. A second viral protein alternatively expressed, the V protein, also contains the N-terminus of P, fused to a zinc finger. We suspected that, despite their high variability, the N-termini of P/V might all be homologous; however, using standard approaches, we could previously identify sequence conservation only in some *Paramyxovirinae*. We now compared the N-termini using sensitive sequence similarity search programs, able to detect residual similarities unnoticeable by conventional approaches. We discovered that all *Paramyxovirinae* share a short sequence motif in their first 40 amino acids, which we called *soyuz1*. Despite its short length (11–16aa), several arguments allow us to conclude that *soyuz1* probably evolved by homologous descent, unlike linear motifs. Conservation across such evolutionary distances suggests that *soyuz1* plays a crucial role and experimental data suggest that it binds the viral nucleoprotein to prevent its illegitimate self-assembly. In some *Paramyxovirinae*, the N-terminus of P/V contains a second motif, *soyuz2*, which might play a role in blocking interferon signaling. Finally, we discovered that the P of related *Mononegavirales* contain similarly overlooked motifs in their N-termini, and that their C-termini share a previously unnoticed structural similarity suggesting a common origin. Our results suggest several testable hypotheses regarding the replication of *Mononegavirales* and suggest that disordered regions with little overall sequence similarity, common in viral and eukaryotic proteins, might contain currently overlooked motifs (intermediate in length between linear motifs and disordered domains) that could be detected simply by comparing orthologous proteins.

**Citation:** Karlin D, Belshaw R (2012) Detecting Remote Sequence Homology in Disordered Proteins: Discovery of Conserved Motifs in the N-Termini of *Mononegavirales* phosphoproteins. PLoS ONE 7(3): e31719. doi:10.1371/journal.pone.0031719

**Editor:** Niall James Haslam, University College Dublin, Ireland

**Received:** November 28, 2011; **Accepted:** January 18, 2012; **Published:** March 5, 2012

**Copyright:** © 2012 Karlin, Belshaw. This is an open-access article distributed under the terms of the Creative Commons Attribution License, which permits unrestricted use, distribution, and reproduction in any medium, provided the original author and source are credited.

**Funding:** This work was supported by the Wellcome Trust grant number 090005. The funders had no role in study design, data collection and analysis, decision to publish, or preparation of the manuscript.

**Competing Interests:** The authors have declared that no competing interests exist.

\* E-mail: david.karlin@zoo.ox.ac.uk

## Introduction

*Paramyxovirinae* are a large subfamily of viruses containing nine human pathogens such as measles virus, mumps virus and the emergent Hendra and Nipah viruses. The viral Phosphoprotein (P) plays a central role in viral replication and in interferon escape. P plays multiple roles in replication, acting as a co-factor of the viral polymerase (L) and binding to the nucleocapsid [1]. The viral nucleoprotein (N) can self-assemble illegitimately on cellular RNA, and a third function of P is to prevent this by binding N and keeping it in a monomeric form, called N<sup>o</sup>, until encapsidation occurs [1]. The *Paramyxovirinae* P gene expresses other proteins than P from different reading frames (Figure 1): the protein V, which shares its N-terminus with P but has a different C-terminus (forming a zinc finger), and, in some genera, the protein C, which overlaps the N-terminus of P (Figure 1). All three proteins encoded by the P gene play a role in interferon escape [2]. Experimental studies of P are difficult for many reasons: multiple functions, gene overlaps, abundance of structural disorder in P and N [3,4,5], large size of L and the nucleocapsid, and transient interactions.

*Paramyxovirinae* P is composed of two main parts: an N-terminal moiety that is highly variable in sequence and in length, from 150

to 380 amino acids (aa), and is disordered [6,7,8,9], i.e. lacks a defined, stable tertiary structure [10], and a conserved C-terminal moiety comprising a multimerization domain that binds to L, and a nucleocapsid-binding domain (Figure 1). Related viruses from the order *Mononegavirales*, such as *Pneumovirinae*, *Rhabdoviridae* and *Filoviridae*, express a similar protein, usually also called P, which also binds the nucleocapsid, acts as the co-factor of the polymerase, and is also almost always encoded by the second gene of the viral genome. The P of all *Mononegavirales* have a similar organization [11,12,13,14,15,16,17] but there is no apparent sequence or structural similarity in P across all families.

Previously, using standard approaches such as psi-blast [18], we detected sequence similarity in a short region of the N-terminus of some *Paramyxovirinae* P only [5]. However, all *Paramyxovirinae* P are clearly orthologous (i.e. descended from a common ancestor without gene duplication), since their C-termini have statistically significant similarity and they are encoded by genes in the same location [5]. Therefore, we reasoned that their disordered N-terminal moieties might all be also descended from a common ancestor, despite their high variability in sequence and in length. In that case, they might have retained some residual sequence similarity that would have escaped detection by conventional

## The *Paramyxovirinae* P / V / C gene

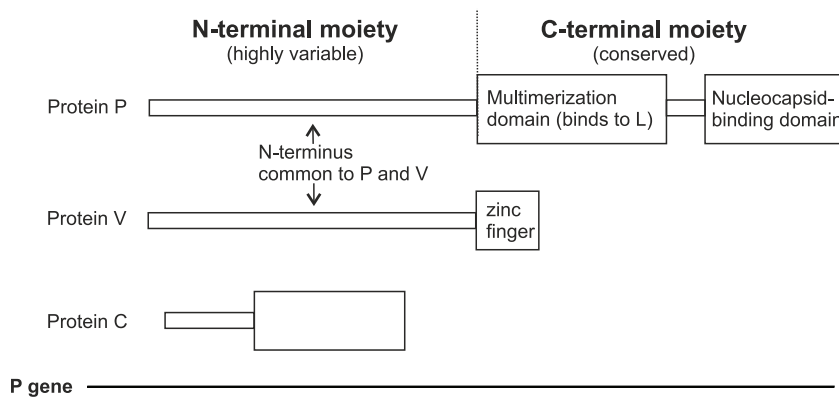

**Figure 1. Organization of the *Paramyxovirinae* P gene.** The P, V and C proteins are encoded from alternative reading frames. V is produced in all *Paramyxovirinae* genera whereas C is only produced in *henipaviruses*, *morbilliviruses*, and *respiroviruses*. doi:10.1371/journal.pone.0031719.g001

approaches. In order to detect such potential regions, we used sensitive bioinformatics approaches that can detect weak similarities between protein regions: profile-profile comparison and multiple sequence alignment coupled with software that can indicate reliably aligned regions. Motifs found by this approach can be validated by examining their prevalence, their location, their function, and by finding them in newly sequenced viruses that were unknown at the time of the analysis.

We discovered that the N-termini of the P of all 45 species of *Paramyxovirinae* share a short sequence motif within their first 40aa, soyuz1. Disordered regions, particularly of viral proteins, are thought to evolve extremely fast and, to our knowledge, this is the first reported example of sequence conservation in a disordered region between such distantly related viruses. We argue that this conservation suggests an important function for soyuz1 and we propose reasons why it might constitute a good drug target. A second motif, soyuz2, is found downstream of soyuz1 in some *Paramyxovirinae*, and may play a role in blocking the interferon pathway.

We analyzed other *Mononegavirales* P and found that their disordered N-termini also contained conserved motifs of similar length, although these might not be homologous to soyuz1. In addition, their C-termini, despite having different folds, contained a structurally and functionally similar region, suggesting that they might have a common origin.

## Materials and Methods

Our hypothesis is that the disordered N-termini of the phosphoproteins might contain regions that are similar in sequence. The similarity is expected to be weak since it has escaped detection so far. At present, the most sensitive method to detect sequence similarities between two query proteins is to gather homologs of each, to derive two multiple sequence alignments (MSAs), each composed of one query protein and of its homologs, and to compare the two MSAs using profile-profile comparison [19]. A sequence profile is a representation of a multiple alignment, containing information about which amino acids are “allowed” at each position of the alignment and about their probability of occurring. Comparing profiles of two multiple alignments is much more powerful than comparing two single sequences, because the profiles contain information about how each sequence can evolve, and can therefore detect weak similarities that remain after both sequences have evolved apart [19].

Our strategy consists of the following steps: 1) collect sequences of orthologous phosphoproteins; 2) extract their N-terminal regions; 3) group them by genus and align them; 4) identify sequence motifs, i.e. regions having detectable, though possibly statistically subsignificant sequence similarity, using profile-profile comparison and multiple sequence alignment; 5) check that their conservation does not result from the presence of an underlying RNA structure; 6) the final step is to validate motifs that have subsignificant similarity. This can be done by a) obtaining *new sequences* from distantly related viruses (if they also have the motif, it is very unlikely to be spurious); b) examining the *prevalence* of the motifs (a motif found in numerous related species is unlikely to have occurred by chance); c) examine the *location* of the motifs (motifs all occurring in exactly the same position are more likely to result from homologous descent than from convergent evolution); and d) examine *functional data* associated with the motifs. This validation step is performed in the Discussion.

## Sequences used in the study

The accession numbers of the sequences of *Paramyxovirinae* P used in this study, as well as the abbreviations of species names are in Table 1. The accession numbers of the P of *Pneumovirinae*, *Filoviridae*, and *Rhabdoviridae* are in Table 2. Unpublished sequences for the *Rhabdoviridae* genus *ephemerovirus* were kindly provided by P.J. Walker. We did not analyse the P of taxa for which too few sequences were available, i.e. *Bornaviridae* and the recent genus *nyavirus* [20]. The N-terminus of P is defined as the part upstream of the multimerization domain (Figure 1).

## Sequence alignment and comparison

We generated multiple sequence alignments (MSAs) of the N-terminal moieties of the P of each *Paramyxovirinae* genus by using MAFFT [21] (version 6 with options L-INS-i). We also used the metapredictor M-coffee [22], ran with all default MSA programs with the exception of MAFFT: PCMA (version 2.0) [23], POA [24], DIALIGN-TX [25], Muscle [26], ProbCons [27], ClustalW [28] and T-Coffee [29]. We examined the reliability of the alignments using Guidance [30] (using the MAFFT option) and CORE [22] (which is part of the standard output of M-coffee [22]). These methods are complementary, since they rely on independent approaches (respectively robustness to changes in

**Table 1.** Sequences of *Paramyxovirinae* P or V proteins.

| Virus species                                                     | Abbreviation | Genus                      | Accession number       |
|-------------------------------------------------------------------|--------------|----------------------------|------------------------|
| <i>Atlantic salmon paramyxovirus</i>                              | Atlantic PMV | <i>Respirovirus</i> -like  | B1NLR3                 |
| <i>Avian Paramyxovirus 2</i>                                      | Avian PMV2   | <i>Avulavirus</i>          | B4Y565                 |
| <i>Avian Paramyxovirus 3</i>                                      | Avian PMV3   | <i>Avulavirus</i>          | B5L5T6                 |
| <i>Avian Paramyxovirus 4</i>                                      | Avian PMV4   | <i>Avulavirus</i>          | B6UPM7                 |
| <i>Avian Paramyxovirus 5</i>                                      | Avian PMV5   | <i>Avulavirus</i>          | D3X604                 |
| <i>Avian Paramyxovirus 6</i>                                      | Avian PMV6   | <i>Avulavirus</i>          | 295810683              |
| <i>Avian Paramyxovirus 7</i>                                      | Avian PMV7   | <i>Avulavirus</i>          | 224979460              |
| <i>Avian Paramyxovirus 8</i>                                      | Avian PMV8   | <i>Avulavirus</i>          | C5I0V3                 |
| <i>Avian Paramyxovirus 9</i>                                      | Avian PMV9   | <i>Avulavirus</i>          | 217068695              |
| <i>Avian Paramyxovirus 10</i>                                     | Avian PMV10  | <i>Avulavirus</i>          | 300432147              |
| <i>Beilong virus</i>                                              | Beilong      | <i>Henipavirus</i> -like   | Q287X8                 |
| <i>Bovine parainfluenza virus 3</i>                               | bPIV3        | <i>Respirovirus</i>        | P06162                 |
| <i>Canine distemper virus</i>                                     | Canine DV    | <i>Morbillivirus</i>       | Q9DGW6                 |
| <i>Dolphin Morbillivirus</i>                                      | Dolphin MV   | <i>Morbillivirus</i>       | 1586312                |
| <i>Bat paramyxovirus/Eid_hel/GH-M74a/GHA/2009</i>                 | Bat PMV      | <i>Henipavirus</i>         | Personal communication |
| <i>Fer de lance virus</i>                                         | Fer de lance | <i>Ferlavirus</i>          | 34391488               |
| <i>Hendra virus</i>                                               | Hendra       | <i>Henipavirus</i>         | O55777                 |
| <i>Human parainfluenza virus 1</i>                                | hPIV1        | <i>Respirovirus</i>        | P32530                 |
| <i>Human parainfluenza virus</i>                                  | hPIV2        | <i>Rubulavirus</i>         | P19847                 |
| <i>Human parainfluenza virus 2</i>                                | hPIV3        | <i>Respirovirus</i>        | P06163                 |
| <i>Human parainfluenza virus 4</i>                                | hPIV4        | <i>Rubulavirus</i>         | P21739                 |
| <i>J virus</i>                                                    | J virus      | <i>Henipavirus</i> -like   | Q49HN9                 |
| <i>Mapuera virus</i>                                              | Mapuera      | <i>Rubulavirus</i>         | A3R041                 |
| <i>Measles virus</i>                                              | Measles      | <i>Morbillivirus</i>       | Q9EMA9                 |
| <i>Menangle virus</i>                                             | Menangle     | <i>Rubulavirus</i>         | 82712718               |
| <i>Mossman virus</i>                                              | Mossman      | <i>Morbillivirus</i> -like | Q6WGM4                 |
| <i>Mumps virus</i>                                                | Mumps        | <i>Rubulavirus</i>         | P30927                 |
| <i>Nariva virus</i>                                               | Nariva       | <i>Morbillivirus</i> -like | B8XH60                 |
| <i>Newcastle disease virus</i>                                    | Newcastle    | <i>Avulavirus</i>          | P0C765                 |
| <i>Nipah virus</i>                                                | Nipah        | <i>Henipavirus</i>         | Q997F2                 |
| <i>Pacific salmon paramyxovirus</i>                               | Pacific PMV  | <i>Respirovirus</i> -like  | JF795583               |
| <i>Parainfluenza virus 5</i>                                      | PIV5         | <i>Rubulavirus</i>         | P11207                 |
| <i>Peste des petits ruminants virus</i>                           | PPRV         | <i>Morbillivirus</i>       | C3W4R0                 |
| <i>Phocine distemper virus</i>                                    | Phocine DV   | <i>Morbillivirus</i>       | P35941                 |
| <i>Pigeon Paramyxovirus 1 (strain of Newcastle disease virus)</i> | Pigeon PMV1  | <i>Avulavirus</i>          | 258547241              |
| <i>Porcine rubulavirus</i>                                        | Porcine RV   | <i>Rubulavirus</i>         | 151266279              |
| <i>Rinderpest virus</i>                                           | Rinderpest   | <i>Morbillivirus</i>       | P60169                 |
| <i>Salem virus</i>                                                | Salem        | <i>Morbillivirus</i> -like | Q9IZC0                 |
| <i>Sendai virus</i>                                               | Sendai       | <i>Respirovirus</i>        | P04859                 |
| <i>Simian virus 41</i>                                            | SV41         | <i>Rubulavirus</i>         | P36315                 |
| <i>Tioman virus</i>                                               | Tioman       | <i>Rubulavirus</i>         | Q91NG9                 |
| <i>Tuhoko virus 1</i>                                             | Tuhoko1      | <i>Rubulavirus</i>         | 298388482              |
| <i>Tuhoko virus 2</i>                                             | Tuhoko2      | <i>Rubulavirus</i>         | 298388490              |
| <i>Tuhoko virus 3</i>                                             | Tuhoko3      | <i>Rubulavirus</i>         | 298388498              |
| <i>Tupaia paramyxovirus</i>                                       | Tupaia PMV   | <i>Morbillivirus</i> -like | Q9QM81                 |

doi:10.1371/journal.pone.0031719.t001

phylogenetic guide trees, and degree of agreement between several multiple alignment algorithms). We discarded parts of the MSAs that we did not consider to be reliably aligned.

We compared in a pairwise fashion the MSAs of P of each *Paramyxovirinae* genus by making profile-profile comparisons with HHalign [31]. The threshold for statistically significant

**Table 2.** Sequences of *Pneumovirinae*, *Filoviridae*, and *Rhabdoviridae* P protein.

| Family or subfamily           | Genus                        | Virus species                               | Accession number                         |           |
|-------------------------------|------------------------------|---------------------------------------------|------------------------------------------|-----------|
| <i>Pneumovirinae</i>          | <i>Metapneumovirus</i>       | Avian metapneumovirus                       | 50898284                                 |           |
|                               |                              | Human metapneumovirus                       | 46852134                                 |           |
|                               | <i>Pneumovirus</i>           | Human respiratory syncytial virus           | 9629202                                  |           |
|                               |                              | Bovine respiratory syncytial virus          | 9631271                                  |           |
|                               |                              | Pneumonia virus of mice                     | 56900718                                 |           |
| <i>Filoviridae</i>            | <i>Ebolavirus</i>            | Ivory Coast ebolavirus                      | B8XCN7                                   |           |
|                               |                              | Bundibugyo ebolavirus                       | B8XCM8                                   |           |
|                               |                              | Zaire ebolavirus                            | Q6V1Q9                                   |           |
|                               |                              | Sudan ebolavirus                            | Q5XX07                                   |           |
|                               |                              | Reston ebolavirus                           | Q91DE0                                   |           |
|                               | <i>Cuevavirus</i>            | LLoviu virus                                | 353745024                                |           |
|                               | <i>Marburgvirus</i>          | Marburg virus                               | Q1PD52                                   |           |
|                               | <i>Rhabdoviridae</i>         | <i>Lyssavirus</i>                           | Rabies virus                             | P22363    |
| Australian bat lyssavirus     |                              |                                             | Q9QSP3                                   |           |
| European bat lyssavirus 1     |                              |                                             | A4UHP9                                   |           |
| Shimoni bat virus             |                              |                                             | D4NRJ9                                   |           |
| Mokola                        |                              |                                             | P0C569                                   |           |
| West Caucasian bat lyssavirus |                              |                                             | Q5VKP1                                   |           |
| <i>Vesiculovirus</i>          |                              |                                             | Vesicular stomatitis virus (VSV) Indiana | Q5VKP1    |
|                               |                              |                                             | Maraba virus                             | 298563846 |
|                               |                              |                                             | Cocal virus                              | B3FRK7    |
|                               |                              |                                             | Vesicular stomatitis virus (VSV) Alagoas | B3FRL2    |
|                               |                              | Carajas virus                               | 298563847                                |           |
|                               |                              | Vesicular stomatitis virus (VSV) New Jersey | P04877                                   |           |
|                               |                              | Isfahan virus                               | Q5K2K6                                   |           |
|                               |                              | Chandipura virus                            | P16380                                   |           |
|                               |                              | Piry virus                                  | Q01769                                   |           |
|                               | Pike fry virus               | C3VM12                                      |                                          |           |
|                               | Spring viremia of carp virus | Q91DS2                                      |                                          |           |

doi:10.1371/journal.pone.0031719.t002

similarity was set at the commonly used value  $E = 1 \times 10^{-3}$ , and we also examined subsignificant similarities that had E-values between  $1 \times 10^{-1}$  and  $1 \times 10^{-3}$ . To generate an MSA of the N-termini of all *Paramyxovirinae* P and examine its reliability, we proceeded as above. All alignments presented in the Figures were visualized using Jalview [32], with the ClustalX colouring scheme (see Figure 2b and 2d in [33]), and are available on request.

We followed the same approach for the P of other *Mononegavirales* families.

### Sequence motif discovery

We used the following programs (all ran from their web interface using default parameters) in order to identify over-represented sequence motifs in the N-termini of *Paramyxovirinae* P: MEME [34] (version 4.7.0), DILIMOT [35], and SlimFinder [36] (version 4.1).

### Nucleotide sequence analyses

The nucleotide alignments corresponding to the amino acid alignments of the N-termini of P were obtained using Protogene [37], which is part of the T-coffee suite at <http://www.igs.cnrs->

[mrs.fr/Tcoffee/tcoffee.cgi/index.cgi](http://mrs.fr/Tcoffee/tcoffee.cgi/index.cgi). We used the metaserver WAR [38] to predict the secondary structure of RNAs.

In order to detect nucleotide constraints imposed by a potential RNA structure underlying soyuz1 or soyuz2, we examined visually the nucleotide variability at each codon position of the alignment. A constraint exerted mostly at the protein level would result in the second codon positions being the most conserved, and the third codon positions the least conserved. Conversely, departure from this pattern would indicate the presence of selection exerted at the nucleotide level.

### Protein sequence analyses

Secondary structure was predicted using Jpred [39]. Disordered regions were predicted using Medor [40], according to the principles described in [41]. We used Composition Profiler [42] to analyze the compositional bias (enrichment or depletion) of different regions in specific amino acids when compared to SwissProt (release 51).

The physico-chemical characters of amino acids are as follows (see also Figure 2d in [33]): aliphatic (IVL); hydrophobic (WFYMLIVACTH); alcohol (ST); polar (DEHKNQRST); tiny (AGCS); small (AGCSVNDTP); bulky (EFIKLMQRWY); posi-

tively charged, i.e. basic (KRH); negatively charged, i.e. acidic (DE); or charged (DEKRH).

To investigate the 3D structure of soyuz1 and soyuz2, we examined the three structures available for PIV5 V: a monomer of V bound to DDB1 alone (PDB accession number 2b5l, chains C and D) [43], and a monomer of V bound to the complex DDB1-CUL4-ROC1 (accession number 2hye, chain B), which is the one presented in Figure 7 [44]. Structural comparison between *Mononegavirales* P was carried out using FATCAT [45].

## Results

### The N-terminal tip of all *Paramyxovirinae* P, except *respiroviruses*, contain a common motif of 16aa, soyuz1

The N-termini of *Paramyxovirinae* P are globally alignable within each genus, but not between different genera. Therefore, we first generated multiple sequence alignments (MSAs) of the N-terminal moieties of the P of each *Paramyxovirinae* genus and then compared the MSAs in a pairwise fashion (see Material and Methods). HHalign reported statistically significant similarities between the first 50–60aa of *rubulavirus*, *avulavirus* and *henipavirus* P, with E-values around  $1 \times 10^{-6}$ . This corresponds to the conserved region described previously in these genera only (described in Figure 7 of [5]). However, HHalign also reported subsignificant similarities ( $E > 1 \times 10^{-3}$ ) between the first 40aa of the P of other genera, for instance between *henipavirus* and *morbillivirus* P ( $E = 1.7 \times 10^{-3}$ ) corresponding respectively to aa 7–26 of *Nipah virus* P and to aa 9–28 of *measles virus*, or between *henipavirus* and *respirovirus* P ( $E = 1.5 \times 10^{-3}$ ), corresponding to aa 6–18 of *Nipah virus* P and aa 25–36 of *Sendai virus* P. Thus, the P of most *Paramyxovirinae* have a short region of marginal sequence similarity in their extreme N-terminus.

To investigate further this similarity, we aligned the first 60aa of *Paramyxovirinae* P using MSA algorithms classified among the best-performing in recent benchmarks, and examining their reliability using two complementary methods (see Material and Methods). A region of 16aa, which we called soyuz1, was reliably aligned in the N-termini of the P of all *Paramyxovirinae* except *respiroviruses* (Figure 2). Soyuz1 contains four positions with strict physico-chemical conservation (see Material and Methods for the classification of amino acids employed here). They are located in positions 1, 4, 8 and 11, shown in bold above the alignment in Figure 2 (numbering starts at the first position with strict conservation). Soyuz1 also contains 6 positions with good (>80%), but not strict, physico-chemical conservation, shown above the alignment in Figure 2. In all genera, soyuz1 was predicted to form a short  $\alpha$ -helix, upstream of a long region devoid of secondary structure.

### Soyuz1 is also present in *respirovirus* P but in a shorter form of 11aa

We examined the N-terminus of P in the remaining genus, *respirovirus*. It is highly variable but we identified a short region (aa 25–36 in *Sendai virus*) predicted to form an  $\alpha$ -helix, conserved in all *respiroviruses* and also in the related *Atlantic salmon paramyxovirus* (Figure 3). This region contains the same four conserved positions as soyuz1, if one allows in position 4 small aa, such as V (found in hPIV1 and *Sendai virus*), instead of only tiny aa (Figure 3). We aligned the first 60aa of all *Paramyxovirinae* P, including *respiroviruses*. MAFFT and M-coffee aligned the conserved region of *respirovirus* P with the soyuz1 of other *Paramyxovirinae* (see Figure 4), but the alignment was deemed less reliable by CORE and GUIDANCE. All generally conserved positions of soyuz1 were also conserved in *respiroviruses*, with the exception of positions –5 and –1. We

conclude that *respirovirus* P also have a soyuz1 motif, albeit in a shorter version (11aa), starting at aa 1 instead of aa –5.

### Newly sequenced *Paramyxovirinae* P also contain a soyuz1 motif

We obtained two unpublished sequences of P: that of *bat paramyxovirus* (a new *henipavirus* isolated from African bats and kindly contributed by F.J. Drexler) and that of *Pacific salmon paramyxovirus* [46,47] (related to *respiroviruses* and kindly contributed by J. Winton and B. Batts). We found both to contain the soyuz1 motif (Figure 4). In addition, while this manuscript was in preparation, the sequence of a new *Paramyxovirinae*, *Tailan virus*, related to *Beilong virus*, was published [48], and it also contains the soyuz1 motif (not shown).

In summary, in all *Paramyxovirinae*, i.e. 45 species including nine human pathogens (marked by a skull and crossbones symbol in Figure 4), P contains in its first 40aa a short motif, soyuz1, with predicted  $\alpha$ -helical potential. Note that the protein V also contains the soyuz1 motif, since it has the same N-terminus as P (Figure 1).

### Soyuz2, a motif downstream of soyuz1 conserved in most *rubulaviruses*, *avulaviruses* and *henipaviruses*

A region of 20aa is conserved downstream of soyuz1 in *rubulaviruses*, *avulaviruses* and *henipaviruses*, with the exception of *hPIV4*, *mapuera virus*, *porcine RV* and *avian PMV3* (see Figure 2). We called this motif soyuz2 and present it in more detail in Figure 5. Its most striking feature is a strictly conserved E in last position. Soyuz2 corresponds to the second half of the conserved region we had previously detected (described in Figure 7 of [5]). However, the alignment of soyuz2 was incorrect because it mistakenly incorporated *hPIV4* and *porcine RV*, and as a consequence the alignment failed to reveal several conserved positions reported herein, including the strict conservation of E. We could find no region similar to soyuz2 in other viruses, with the exception of *Nariva virus* and *Mossman virus* (phylogenetically close to *morbilliviruses* and *henipaviruses*), which might have a degenerate version of the motif (Figure 2). The rest of P is extremely variable among *Paramyxovirinae* P (see Figure 6).

In summary, all *Paramyxovirinae* P contain a short motif, soyuz1, while some *rubulaviruses*, *avulaviruses*, and *henipaviruses* contain another motif, soyuz2, downstream of soyuz1. In these genera, soyuz1 and soyuz2 correspond respectively to the first and second half of the conserved region we had previously described [5]. However, the P of the three other *Paramyxovirinae* genera also contain a soyuz1 motif, previously undetected. In our previous work, we could detect soyuz1 using standard approaches such as psi-blast only because in some genera it occurs together with soyuz2, which is very well conserved. We could identify the presence of soyuz1 in the three remaining *Paramyxovirinae* genera only by carefully examining subsignificant similarities in profile-profile comparisons (in the present work).

### Soyuz1 is enriched in order-promoting and acidic residues, while soyuz2 is enriched in flexible and basic residues

We studied the amino acid composition of soyuz1 and soyuz2 (see Material and Methods). Globally, soyuz1 is significantly ( $P < 0.01$ ) depleted in the positively charged residue R and enriched in negatively charged (acidic) residues D and E. Soyuz1 is thus negatively charged or neutral in most species, with the exception of *morbilliviruses* and some unclassified species, which can be positively charged. Remarkably, soyuz1 never contains any Proline; this depletion is highly significant ( $P = 10^{-6}$ ). Given that



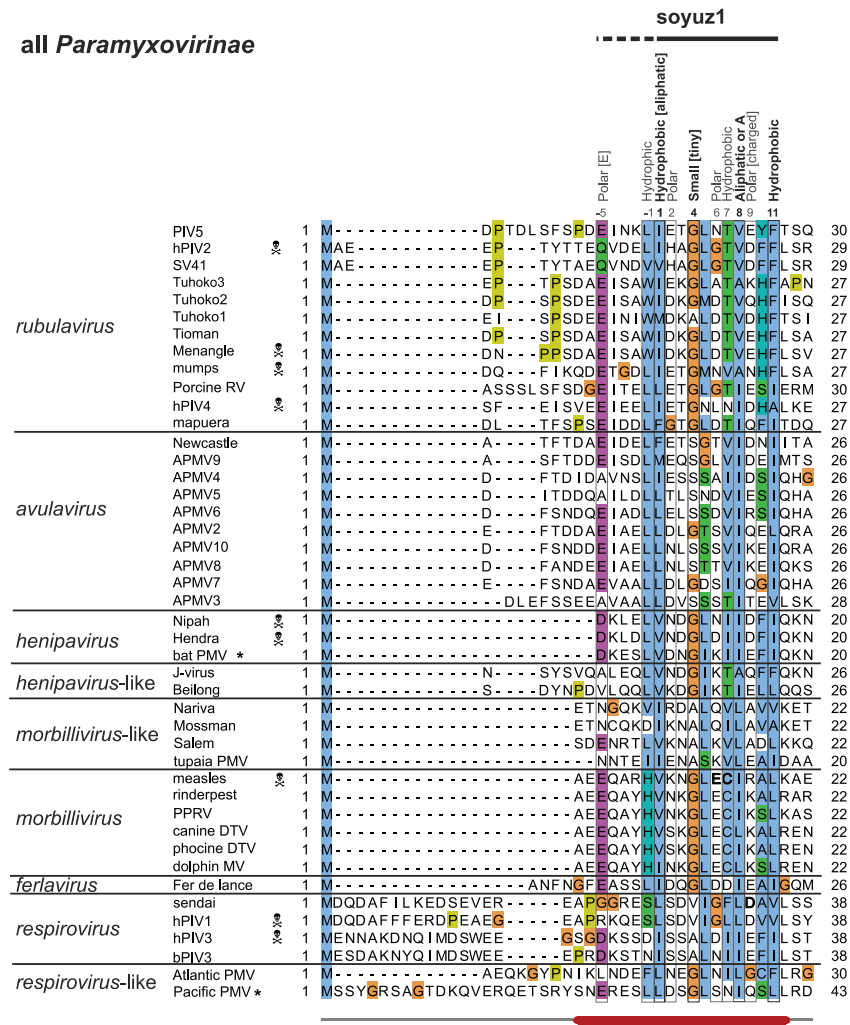

**Figure 4. Alignment of the N-termini of P from all *Paramyxovirinae*.** Conventions as in Figure 2. The part of soyuz1 not conserved in *respiroviruses* is indicated by a dashed line above the alignment. Species pathogenic for humans are marked by a skull and crossbones. Experimentally characterized substitutions in *measles virus* and *Sendai virus* are in bold. doi:10.1371/journal.pone.0031719.g004

Proline is strongly disfavored in helices, and that soyuz1 is consistently predicted as  $\alpha$ -helical, this suggests that soyuz1 might need to form an  $\alpha$ -helix to perform its function(s). Finally, soyuz1 is globally enriched in order-promoting, bulky, and hydrophobic aa (I in particular).

On the contrary, the soyuz2 motif is depleted in acidic residues (D in particular) and thus almost always positively charged. It is depleted in order-promoting residues and enriched in disorder-promoting ones.

In conclusion, soyuz1 is often negatively charged, is hydrophobic, and has a strong propensity towards  $\alpha$ -helices, whereas soyuz2 is positively charged and likely to be highly flexible.

**Soyuz1 and soyuz2 are mostly in extended conformation in the only 3D structure available**

As mentioned in the Introduction, the N-terminus of P has been found experimentally to be mostly disordered in many *Paramyxovirinae* (by disorder we mean lack of stable tertiary structure; this does not exclude transient secondary structure). However, the N-terminus of P has recently been observed in an ordered state, in the V protein of *parainfluenza virus 5* (PIV5), a *rubulavirus*, bound to

the cellular protein DDB1 [43,44]. In the structure, solved by X-ray crystallography, regions upstream of soyuz1 (aa1–9) and downstream of soyuz2 (aa 55–80) are not observable, presumably because they are disordered (they are indicated by dotted lines in Figure 7). In particular, the strictly conserved E of soyuz2 (E56 in PIV5) is not observable, which suggests that DDB1 is not the natural target of soyuz2.

Figure 7 represents the complex between DDB1 (in grey) and V (in purple), with soyuz1 in red and soyuz2 in blue. V is composed of two structurally independent elements [43,44]: a non-globular moiety (aa 1–40, to the right-hand side of V in Figure 7), and a globular moiety (aa 41–222), to the left hand-side of V in Figure 7). The first moiety of V contains an  $\alpha$ -helix, called the H helix (indicated by text in Figure 7), which provides the main contribution to binding DDB1, by inserting itself into a pocket of DDB1 [49]. The second moiety contains a seven-stranded  $\beta$ -sheet followed by a zinc finger. Only the first four  $\beta$ -strands are visible in Figure 7.

As can be seen in Figure 7, soyuz1 and soyuz2 mostly adopt an extended conformation with little regular secondary structure when bound to DDB1, with two exceptions: six aa of soyuz1

# The soyuz module

**A**

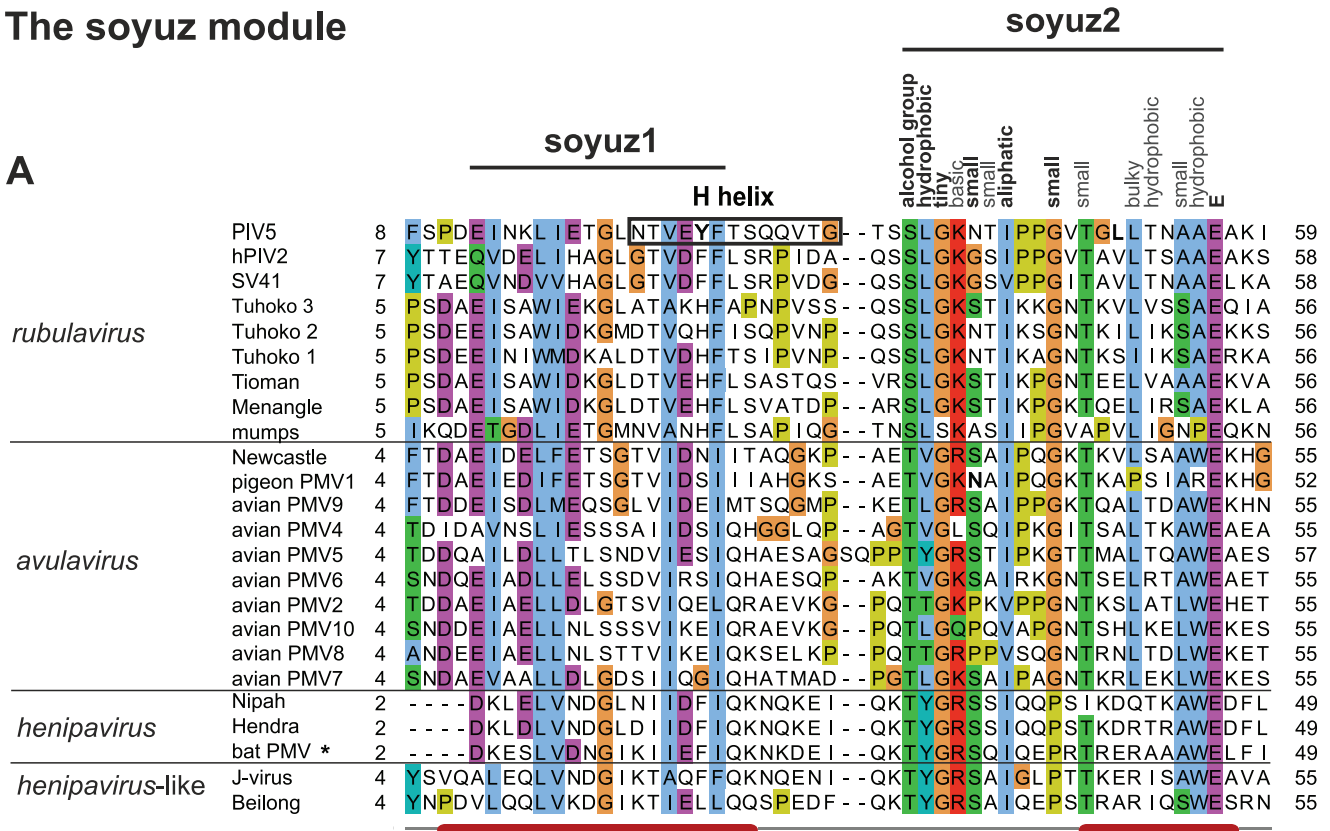



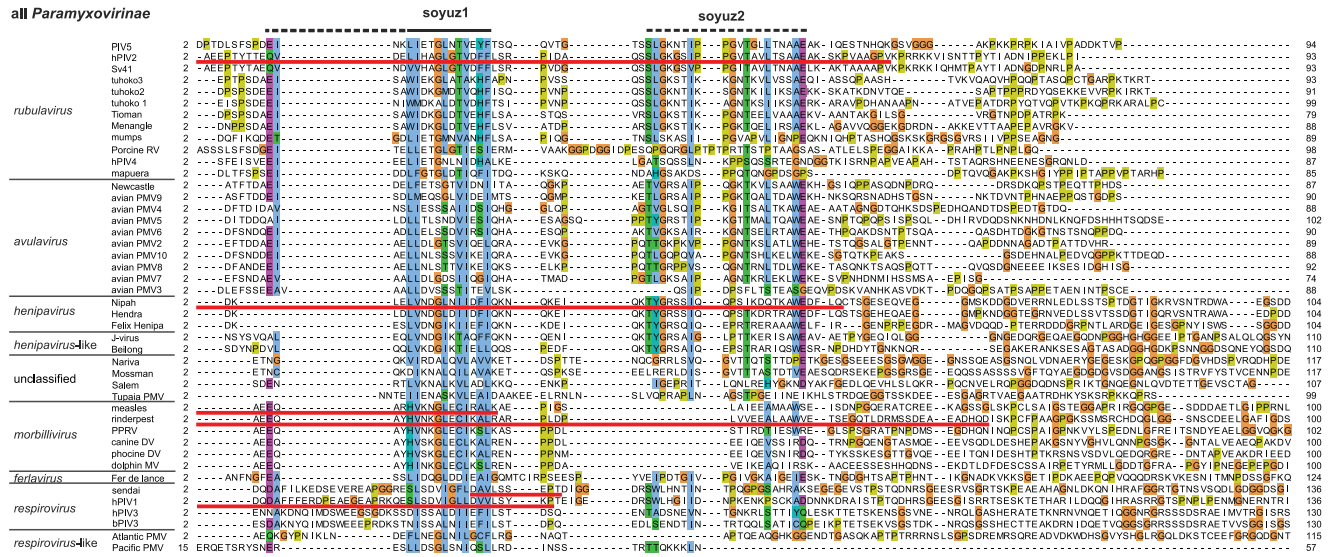

**Figure 6. Alignment of the first 100aa of all *Paramyxovirinae* P. Conventions as in Figure 2.** The boundaries of N<sup>o</sup>-binding regions (underlined in red) have generally been determined indirectly (Table 3), and thus should be taken as approximate. Regions downstream of soyuz1 and soyuz2 (90–330aa in length, of which only ~50aa are visible on the figure) are unalignable between different genera of *Paramyxovirinae*. doi:10.1371/journal.pone.0031719.g006

disordered in isolation but can fold upon binding their target [54]. We searched the literature for functional information associated with soyuz1 and found that it is located within the N<sup>o</sup>-binding site of P in almost all *Paramyxovirinae* for which experimental data are available (Table 2 and Figure 6). This strongly suggests that soyuz1 plays a role in binding N<sup>o</sup>. The only exception is *Sendai virus*, a *respirovirus*, in which soyuz1 is not entirely encompassed within the N<sup>o</sup>-binding site of P but rather overlaps it by 3aa (see Table 3, Figure 3 and Figure 6). However, in the article that determined

this N<sup>o</sup>-binding site [55], we noticed that the sequence reported as that of hPIV1 P was actually that of hPIV1 C. While this does not impact on the authors' experimental conclusions, it means that the region actually conserved in *respirovirus* P (aa 25–42 of *Sendai virus* P) is larger than that reported in their article (aa 32–42), and in fact encompasses soyuz1 (Figure 3).

Examining the effect of substitutions introduced into soyuz1 might yield further clues to its function(s). We could find only two studies that performed such substitutions. A double substitution (E14A - C15A) in *measles virus* V (in bold in Figure 4) caused only a very minor reduction in binding to N<sup>o</sup> [56], and the substitution D33G in *Sendai virus* P (in bold in Figure 3 and Figure 4) had no apparent effect on viral replication [55]. We note, however, that the effect of the former substitution was tested on V rather than P, and that these substitutions did not affect the three positions of soyuz1 that are strictly conserved physico-chemically (Figure 4).

**The N-terminal tips of other *Mononegavirales* P also contain conserved motifs**

Other *Mononegavirales* P have an organization similar to that of *Paramyxovirinae*, shown in Figure 1. We found that the P of most *Mononegavirales* have an N-terminal “tip” with features similar to those of soyuz1, i.e. a low variability and one or two predicted secondary structure elements located upstream of a variable region devoid of predicted secondary structure. In particular, all *Pneumovirinae* P have a conserved N-terminal motif, which we called mir (Figure 8A). Likewise, the P of all *Filoviridae* have a conserved N-terminal motif (Figure 8B), which we called sputnik (we could not find previous descriptions of these motifs in the literature). The similarity between the mir motif of *metapneumovirus* and *pneumovirus* P was not significant ( $E = 1.4 \times 10^{-3}$ ), while the similarity between the sputnik motif of *ebolaviruses* and *Marburg virus* was significant ( $E = 1.4 \times 10^{-7}$ ). Interestingly, while this manuscript was in preparation, the sequence of a new *Filoviridae*, *LLvivi virus*, was published [57], and it also contains the sputnik motif (Figure 8B).

We could find a conserved N-terminal region only in the P of three genera of the *Rhabdoviridae*: *vesiculoviruses*, *hysaviruses*

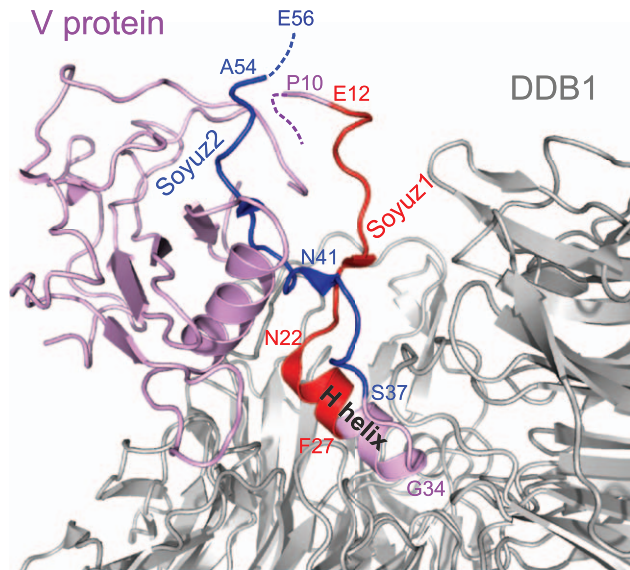

**Figure 7. Structure of the V protein from *parainfluenza virus 5* bound to DDB1.** The PDB accession number of the structure is 2HYE. Aa 1–9 and aa 55–80 of V, encompassing the last 2aa of soyuz2, are not visible in the crystal structure, presumably because they are disordered (see text). Soyuz1 is coloured red and soyuz2 blue. The H helix of V, bound to DDB1, is indicated; it partially overlaps with soyuz1. doi:10.1371/journal.pone.0031719.g007

**Table 3.** Functional information associated with the soyuz1 motif.

| Genus                | Species    | Protein characterized <sup>1</sup> | Location of soyuz1 (aa) | Region characterized <sup>2</sup> | Function of that region <sup>3</sup> | References    |
|----------------------|------------|------------------------------------|-------------------------|-----------------------------------|--------------------------------------|---------------|
| <i>Rubulavirus</i>   | PIV5       | V                                  | 12–27                   | 22–34 (=H helix)                  | Binds to DDB1                        | [49]          |
| <i>Rubulavirus</i>   | hPIV2      | P and V                            | 11–26                   | 1–46                              | Nuclear Localisation Signal          | [109]         |
| <i>Rubulavirus</i>   | hPIV2      | P and V                            | 11–26                   | 1–46                              | Binds to N°                          | [110,111,112] |
| <i>Henipavirus</i>   | Nipah      | V                                  | 2–17                    | 1–50                              | Binds to N                           | [113]         |
| <i>Morbillivirus</i> | Measles    | P and V                            | 4–19                    | 1–20                              | Binds to N°                          | [56,114]      |
| <i>Morbillivirus</i> | Rinderpest | P                                  | 4–19                    | 1–59                              | Bind to N                            | [93]          |
| <i>Respirovirus</i>  | Sendai     | P                                  | 25–35                   | 33–41                             | Binds to N°                          | [55]          |
| <i>Respirovirus</i>  | hPIV3      | P                                  | 25–35                   | 1–40                              | Binds to N°                          | [115]         |

<sup>1</sup>P and V share the same N-terminus, containing soyuz1 (see Figure 1). We indicate whether the study was carried out on P or/and V.

<sup>2</sup>The location of these functional regions have generally been determined indirectly, and should thus be taken as approximate boundaries.

<sup>3</sup>In cases where the form of N was not characterized (either N° or the nucleocapsid), we report “N”.

doi:10.1371/journal.pone.0031719.t003

(Figure 8C), and *ephemeroviruses* (not shown), and there was no detectable sequence similarity between the genera. This might be related to the much higher overall sequence variability of *Rhabdoviridae* P when compared to other *Mononegavirales*. The N-terminal motifs of *Pneumovirinae* (Figure 8A) and *Rhabdoviridae* (Figure 8C) are predicted or known [58] to be  $\alpha$ -helical, like soyuz1. The sputnik motif of *Filoviridae* is clearly different, since it contains a short predicted  $\beta$ -strand and a Proline (Figure 8B).

These N-terminal motifs have no detectable sequence similarity, with one potential exception. The mir motif of *metapneumoviruses* has striking similarity to soyuz1, matching 9 out of its 10 conserved positions (Figure 8, panel A1). Nevertheless, this similarity should be taken with caution since it is based on only two sequences, and since the mir motif of the other *Pneumovirinae* genus, *pneumovirus*, matches only two of the four characteristic positions of soyuz1, positions 4 and 11, and contains a Proline, absent from soyuz1 (Figure 8, panel A2).

The functions of the mir and sputnik motifs are unknown, to our knowledge, whereas the conserved N-termini of *Rhabdoviridae* P are known to bind N° (Figure 8C), like in *Paramyxovirinae* [59,60]. The N°-binding region of VSV P has recently been determined precisely by X-ray crystallography [58], and it corresponds well to the region conserved in other *vesiculoviruses* (Figure 8C).

### The C-termini of Mononegavirales P contain a structurally similar region

The common organization of *Mononegavirales* P and their common genomic location suggests that they may have originated from a common ancestor and we therefore looked in detail at potential structural similarities. Their multimerization domains are structurally dissimilar [61,62,63]. On first inspection, their C-terminal domains are also very different: they form a triple  $\alpha$ -helix bundle in *Paramyxovirinae* (“X domain”) [64,65,66], a mixed  $\alpha$ - $\beta$  fold in *Rhabdoviridae* [67,68], and an  $\alpha$ -helix subdomain packed against a  $\beta$ -sheet subdomain in *Filoviridae* (Interferon Inhibitory Domain, IID) [69]. Nevertheless, we performed a similarity search on the recently solved structure of *Zaire ebolavirus* IID. FATCAT [45] reported the X domain of *Paramyxovirinae* P within the first 15 hits, superposing it well ( $P = 1.28 \times 10^{-3}$ , RMSD = 2.6 over 51 aa) with the first three helices of the  $\alpha$ -helical subdomain of IID (aa 218–268, composing 39% of its residues) (Figure 9). We found that the C-terminal domain of the P of *rabies virus*, a *Rhabdoviridae*, also had weak structural similarity with the X domain of *measles virus* P

(superposition over two  $\alpha$ -helices only; not shown), as previously reported [70].

## Discussion

### The motifs we detected probably evolved by homologous descent

The motifs we have identified are certainly not spurious, since they are also present in two distantly related viruses whose sequence was released after our main analysis. The fact that the motifs are present in all species within their respective families (for instance, soyuz1 is present in all 45 *Paramyxovirinae*) strongly suggests that they are functionally important. In theory, they could have originated either by convergent evolution or by homologous descent. The sequence similarity between the motifs of different genera is generally not statistically significant (except for the *Filoviridae* sputnik motif) and cannot by itself discriminate between these two hypotheses. However, in the case of soyuz1, we believe three points argue compellingly in favour of homologous descent. 1) Soyuz1 is demonstrably homologous in *rubulaviruses*, *avulaviruses*, and *henipaviruses*, since in these it has statistically significant similarity. 2) In all genera, soyuz1 is found in exactly the same position, within the first 40aa of P. This common location is much less likely to have originated by convergent evolution. 3) A part of C that overlaps P downstream of soyuz1 (in green in Figure 10) has distant, but statistically significant similarity among *henipaviruses*, *morbilliviruses* and related viruses (not shown). Therefore, the corresponding region of P (crisscrossed in Figure 10) is also homologous in these viruses. Thus, it is not only the C-terminal moiety of P, but almost all of P downstream of soyuz1 that is demonstrably homologous in *henipaviruses* and *morbilliviruses*. This considerably increases the probability that the similarity among their soyuz1 results from homologous descent. Lastly, we note that the fact that *respiroviruses* have a somewhat divergent soyuz1 motif is coherent with *Paramyxovirinae* phylogeny (Figure 10), in which *respiroviruses* are basal [71].

Similarly, the mir motif always occurs in the same position in *Pneumovirinae* P, arguing (albeit less strongly) for homologous descent.

### Soyuz1 probably binds N°

It seems unlikely that the conservation of soyuz1 results from binding a cellular partner involved in antiviral defense, because even closely related viruses often use different proteins or different



(B) Sputnik motif of *Filoviridae*. The asterisk indicates the newly published sequence of *Llovium virus*. (C) N-termini of the P of two *Rhabdoviridae* genera: *lyssavirus* and *vesiculovirus*. A disputed L-binding site in *lyssavirus* P is indicated [108]. The boundaries of the N<sup>o</sup>-binding region of VSV P were obtained from the crystal structure of N<sup>o</sup>-P [58]. doi:10.1371/journal.pone.0031719.g008

regions of a protein to bind the same antiviral protein [72,73]. Thus, we think that soyuz1 probably binds a conserved viral or cellular partner(s) indispensable to viral replication. One of these partners is almost certainly N<sup>o</sup>, since soyuz1 is encompassed within the N<sup>o</sup>-binding site of P in all species for which biochemical data are available (Table 2 and Figure 6). Accordingly, in the *rubulavirus* PIV5, the binding of P to N<sup>o</sup> is mostly of a hydrophobic nature, since it is abolished by detergent but not by strong salts [74]. This is consistent with it occurring through soyuz1, which is very hydrophobic. Intriguingly, the *respirovirus* N<sup>o</sup>-binding site, which has been mapped precisely to a stretch of 8aa, does not correspond exactly to soyuz1 but rather overlaps its first 3aa (Figure 3) [55]. This suggests that the soyuz1 of *respiroviruses*, which is divergent in sequence, might function differently from that of other *Paramyxovirinae*. Alternatively, the conservation of soyuz1 might be explained by it binding not only N<sup>o</sup> but also a second protein whose binding site partially overlaps with that of N<sup>o</sup> but extends upstream. This would provide an attractive mechanism to explain the initiation of encapsidation of the viral genome: by binding to soyuz1, this protein would provoke the release of N<sup>o</sup>, which would then be free to bind to nascent RNA. A candidate for this role might be the polymerase, L.

### Soyuz2, a role in inducing the proteasomal degradation of STAT proteins in *rubulaviruses*?

Soyuz2 is found in only three genera, but in these it is much more conserved than soyuz1 (Figure 2). This suggests that soyuz2 might interact with a cellular partner rather than a viral one. Despite its striking conservation, its function is unknown. However, we think that an elegant comparison between the V of *rubulavirus* hPIV2, which has the soyuz2 motif, and of hPIV4, which does not have it (see Figure 2), suggests a role for soyuz2 in proteasomal degradation of STAT proteins [75]. Both hPIV2 V and hPIV4 V bind the DDB1-cullin4-STAT1-STAT2 complex [75]. However, unlike hPIV2 V, hPIV4 V is incapable of triggering subsequent proteasomal degradation of STAT1 or

STAT2, a key step in blocking interferon signaling [2,76]. Nishio *et al.* [75] replaced a region of hPIV2 V corresponding almost exactly to soyuz2 by the equivalent region of hPIV4 V (boxed in Figure 5B). The exchange abolished the ability of hPIV2 V to block interferon signaling, strongly suggesting that soyuz2 plays a role in it. A study on the *rubulavirus* PIV5 provides additional support: a single substitution of soyuz2, L50P (in bold in Figure 5), decreased the capacity of V to block interferon [77]. Interestingly, this decrease was enhanced by an additional substitution, Y26H, in the H helix that binds DDB1 (Figure 5). Thus, although the great majority of studies on V have focused on its conserved C-terminus [2,76], soyuz2 should also be the subject of investigations. The V proteins of *henipaviruses* and *avulaviruses*, which also contain a soyuz2 motif, inhibit the action of STAT1 through mechanisms different from *rubulaviruses* [78,79,80]. Nevertheless, in view of the conservation of soyuz2, it is tempting to speculate that in the three genera the inhibition of STAT1 might rely on a common cellular target with which soyuz2 interacts. We note that a substitution mapped within soyuz2, N37D (in bold in Figure 5), enhanced replication and virulence of Pigeon paramyxovirus 1, an *avulavirus* [81]. Further studies are needed to determine whether it caused an effect on interferon signaling or on replication, and whether P or V was involved.

### The P of *Mononegavirales* probably share a common origin

This study and another [70] have detected a structural similarity between two  $\alpha$ -helices of the C-terminal domains of *Paramyxovirinae*, *Rhabdoviridae*, and *Filoviridae* P. Several arguments suggest that this similarity, although weak (subsignificant), might be the result of common ancestry: the P proteins are encoded by genes with the same location and have a similar organization; the similarity occurs between domains occupying the same position within P; and finally, the structurally similar regions have the same function: they bind the viral nucleocapsid [70,82,83]. A common origin of domains that have different structural folds might seem improbable, but other examples are known [84] and the two  $\alpha$ -helices might correspond to “elementary functional loops”, which are conserved structural and functional elements proposed to form building blocks of ancestral proteins [85].

### A similar role for the N-termini of *Mononegavirales* P to that proposed in the *Paramyxovirinae*?

All *Mononegavirales* N can self-assemble illegitimately on cellular RNA [86,87,88,89], with the exception of *Bornaviridae* [90,91]. In both *Paramyxovirinae* and *Rhabdoviridae*, the N-terminus of P binds N<sup>o</sup> and keeps it unassembled [5,55,59,60,92,93]. In view of their probable common origin (see above), it would be interesting to investigate whether in *Pneumovirinae* and *Filoviridae* it is also P that prevents the assembly of N<sup>o</sup>, and whether binding occurs through mir and sputnik. Interestingly, in *pneumonia virus of mice*, a *pneumovirus*, a region containing mir has been reported to bind N [94], though what form of N was bound was not studied. We found no published data regarding sputnik, but *Zaire ebolavirus* VP35 mutants lacking sputnik did not support viral replication or transcription, though they were still able to block interferon induction (Grosch and Mühlberger, personal communication).

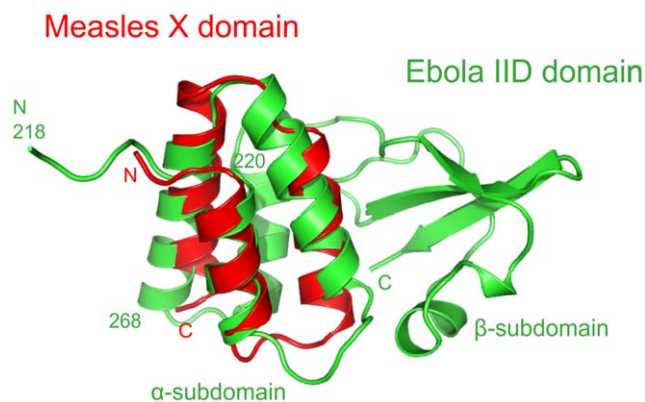

**Figure 9. Structural superposition of the C-termini of two *Paramyxovirinae* and *Filoviridae* P.** FATCAT superposition between the measles virus X domain (PDB accession number 1T60, chain A), in red, and the *Zaire ebolavirus* IID domain (3FKE, chain A), in green. N and C refer to N- and C-termini. doi:10.1371/journal.pone.0031719.g009

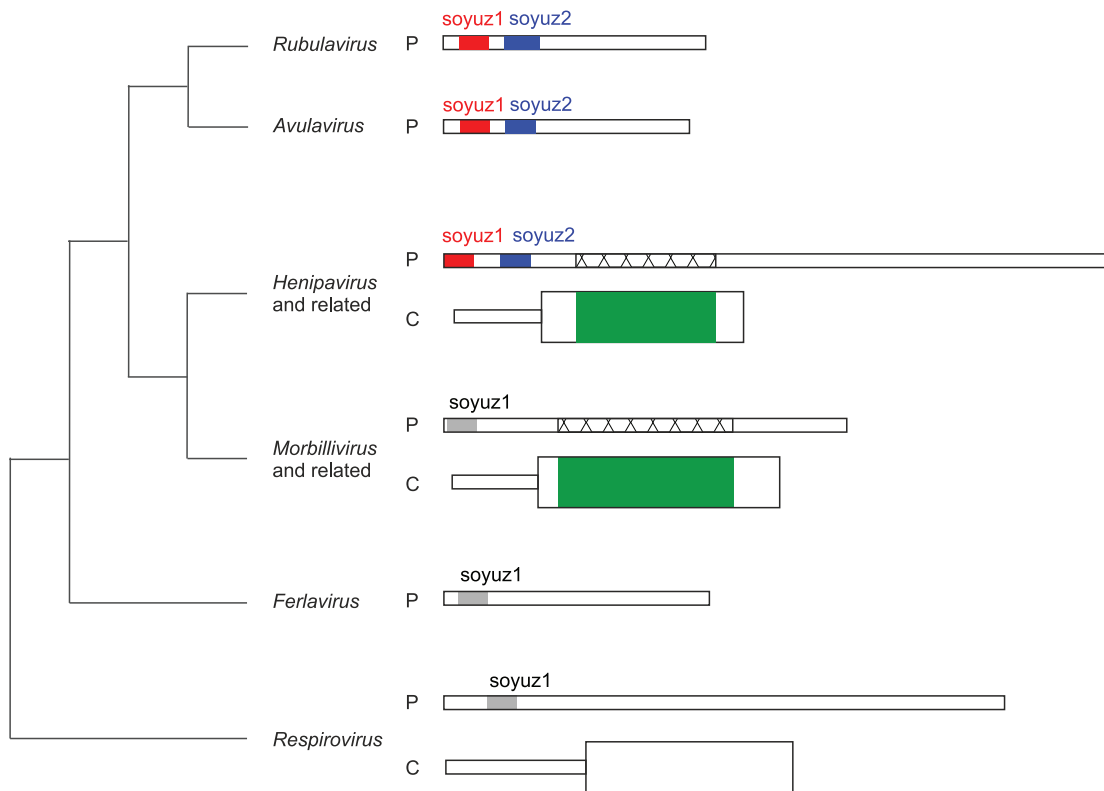

**Figure 10. Regions with sequence similarity in *Paramyxovirinae* P and C.** The N-termini of *Paramyxovirinae* P and the C proteins that overlap them are represented to scale (the N-terminus of *henipavirus* P is about 380aa long). The phylogenetic relationships between different genera are shown on the left as a cladogram based on [71]. Regions with statistically significant similarity (and thus homologous) are shown in the same colours, whereas regions that have subsignificant similarity are shown in grey. The crisscrossed regions of *henipavirus* and *morbillivirus* P are homologous, even though they have no detectable similarity, since they overlap homologous regions of C, in green (see Discussion). doi:10.1371/journal.pone.0031719.g010

### Our approach should allow the identification of previously overlooked short, disordered domains

It has been recently proposed that conserved, disordered regions longer than 20–30aa form a new type of binding elements: “disordered domains”, which fold into specific structures upon binding their target [95,96,97]. These regions often constitute functional, evolutionary and structural units (hence the name “domain”), and were thought to clearly differ from shorter elements, in particular linear motifs (3–11aa) [98], through their binding mode, affinity, and the fact that they arise by homologous descent rather than convergent evolution [95]. Reliable *in silico* identification of disordered domains would be a major advance because they mediate numerous (possibly thousands) of crucial but poorly characterized protein-protein interactions [99]. So far their detection has been restricted to domains longer than 20–30aa [95] because similarities detected between shorter regions are not statistically significant.

Our study shows that carefully examining disordered regions of orthologous proteins allows the detection of shorter regions, such as soyuz1 (11–16aa), which most probably evolved by homologous descent. We expect our approach to detect short disordered domains even in hypervariable, very long regions (up to 380aa for soyuz1). Further improvements in their detection could come from progress in aligning disordered regions [100,101]. Our approach should also be applicable to prokaryotes and eukaryotes, whose orthologs are available in dedicated databases that greatly facilitate their collection [102].

An alternative approach to identify sequence motifs could rely on dedicated software such as MEME [34], DILIMOT [35], and

SlimFinder [36]. Using these programs with default parameters (see Material and Methods), we were unable to fully recover all instances of soyuz1 and soyuz2. This could be due to the fact that the programs are optimized to detect shorter motifs (3–11aa), and are not intended to detect them within very long regions. Nevertheless, we think that these methods could be complementary for future research, especially since they have the advantage of being fully automated. Finally, we note that in principle our approach is also applicable to the discovery of motifs in ordered regions, though this was not the focus of this study.

### An approach to detect new drug targets?

In conclusion, experimental studies are now needed to identify the soyuz1-binding site on N<sup>o</sup>, elucidating what triggers the release of soyuz2 by N<sup>o</sup> during replication, and to identify the function(s) of soyuz2. The use by viral proteins of short peptides located within flexible regions to bind other viral proteins is emerging as a common pattern, found for instance in the interactions between PB1, PA and PB2 in *influenza virus* [103,104,105], and antiviral approaches aimed at disrupting these interactions are being tested [106]. The motifs found by our approach have the double advantage that they are plausible Achilles’ heels of viruses (as suggested by their exceptional conservation) and are found in a wide range of human pathogens. If their biochemical role were confirmed, they might thus constitute new, attractive antiviral drug targets. Recently, Castel *et al.* [107] have provided a proof of concept for this idea by using a peptide mimicking the N<sup>o</sup>-binding site of P to inhibit the replication of *rabies virus*, a *Rhabdoviridae*.

## Acknowledgments

We thank M. Baron, J. Curran, N. Davey, J.F. Eléouët, F. Ferron, R. Iorio, G. Magiorkinis, B. Morin, B. Peeters, RE Randall and C. Dean and her team for comments on the project and on the manuscript, and J. Grimes for help with the structural figures. We also thank J. Winton, B. Batts, R. Marshang, P.J. Walker and J.F. Drexler for their efforts and kindness in providing unpublished sequences of *Mononegavirales* P.

**Note added in Proof.** While this manuscript was in press, an article describing the discovery of several bat *paramyxoviruses* was published [116].

## References

- Whelan SP, Barr JN, Wertz GW (2004) Transcription and replication of nonsegmented negative-strand RNA viruses. *Current Topics in Microbiology and Immunology* 283: 61–119.
- Fontana JM, Bankamp B, Rota PA (2008) Inhibition of interferon induction and signaling by paramyxoviruses. *Immunological Reviews* 225: 46–67.
- Habchi J, Longhi S (2011) Structural disorder within paramyxovirus nucleoproteins and phosphoproteins. *Molecular Biosystems* 8: 69–81.
- Leyrat C, Gerard FCA, Ribeiro ED, Ivanov I, Ruigrok RWH, et al. (2010) Structural disorder in proteins of the rhabdoviridae replication complex. *Protein and Peptide Letters* 17: 979–987.
- Karlin D, Ferron F, Canard B, Longhi S (2003) Structural disorder and modular organization in paramyxovirinae N and P. *Journal of General Virology* 84: 3239–3252.
- Habchi J, Mamelli L, Darbon H, Longhi S (2010) Structural disorder within henipavirus nucleoprotein and phosphoprotein: From predictions to experimental assessment. *PLoS ONE* 5: e11684.
- Karlin D, Longhi S, Receveur V, Canard B (2002) The N-terminal domain of the phosphoprotein of morbilliviruses belongs to the natively unfolded class of proteins. *Virology* 296: 251–262.
- Chinchar VG, Portner A (1981) Inhibition of RNA synthesis following proteolytic cleavage of Newcastle disease virus P protein. *Virology* 115: 192–202.
- Chinchar VG, Portner A (1981) Functions of sendai virus nucleocapsid polypeptides - enzymatic activities in nucleocapsids following cleavage of polypeptide P by *Staphylococcus aureus* protease V8. *Virology* 109: 59–71.
- Gsponer J, Babu MM (2009) The rules of disorder or why disorder rules. *Progress in Biophysics & Molecular Biology* 99: 94–103.
- Schneider U, Blechschmidt K, Schwemmler M, Stacheli P (2004) Overlap of interaction domains indicates a central role of the P protein in assembly and regulation of the borna disease virus polymerase complex. *Journal of Biological Chemistry* 279: 55290–55296.
- Schwemmler M, Salvatore M, Shi L, Richt J, Lee CH, et al. (1998) Interactions of the borna disease virus P, N, and X proteins and their functional implications. *Journal of Biological Chemistry* 273: 9007–9012.
- Leyrat C, Gerard FC, de Almeida Ribeiro E, Jr., Ivanov I, Ruigrok RW, et al. (2010) Structural disorder in proteins of the rhabdoviridae replication complex. *Protein & Peptide Letters* 17: 979–987.
- Gerard FCA, Ribeiro ED, Leyrat C, Ivanov I, Blondel D, et al. (2009) Modular organization of rabies virus phosphoprotein. *Journal of Molecular Biology* 388: 978–996.
- Kimberlin CR, Bornholdt ZA, Li S, Woods VL, Jr., MacRae IJ, et al. (2010) Ebolavirus VP30 uses a bimodal strategy to bind dsRNA for innate immune suppression. *Proceedings of the National Academy of Sciences of the United States of America* 107: 314–319.
- Llorente MT, Garcia-Barreno B, Calero M, Camafeita E, Lopez JA, et al. (2006) Structural analysis of the human syncytial virus respiratory phosphoprotein: characterization of an alpha-helical domain involved in oligomerization. *Journal of General Virology* 87: 159–169.
- Slack MS, Easton AJ (1998) Characterization of the interaction of the human respiratory syncytial virus phosphoprotein and nucleocapsid protein using the two-hybrid system. *Virus Research* 55: 167–176.
- Altschul SF, Madden TL, Schaffer AA, Zhang J, Zhang Z, et al. (1997) Gapped BLAST and PSI-BLAST: a new generation of protein database search programs. *Nucleic Acids Research* 25: 3389–3402.
- Dunbrack RL (2006) Sequence comparison and protein structure prediction. *Current Opinion in Structural Biology* 16: 374–384.
- Mihindukulasuriya KA, Nguyen NL, Wu G, Huang HV, da Rosa AP, et al. (2009) Nyamanini and midway viruses define a novel taxon of RNA viruses in the order Mononegavirales. *Journal of Virology* 83: 5109–5116.
- Kato H, Toh H (2008) Recent developments in the MAFFT multiple sequence alignment program. *Briefings in Bioinformatics* 9: 286–298.
- Moretti S, Armougou F, Wallace IM, Higgins DG, Jongeneel CV, et al. (2007) The M-Coffee web server: a meta-method for computing multiple sequence alignments by combining alternative alignment methods. *Nucleic Acids Research* 35: W645–W648.
- Pei J, Sadreyev R, Grishin NV (2003) PCMA: fast and accurate multiple sequence alignment based on profile consistency. *Bioinformatics* 19: 427–428.
- Lee C, Grasso C, Sharlow MF (2002) Multiple sequence alignment using partial order graphs. *Bioinformatics* 18: 452–464.
- Subramanian AR, Kaufmann M, Morgenstern B (2008) DIALIGN-TX: greedy and progressive approaches for segment-based multiple sequence alignment. *Algorithms for Molecular Biology* 3: 6. doi:10.1186/1748-7188-3-6.
- Edgar RC (2004) MUSCLE: multiple sequence alignment with high accuracy and high throughput. *Nucleic Acids Research* 32: 1792–1797.
- Do CB, Mahabhashyam MSP, Brudno MI, Batzoglou S (2005) ProbCons: Probabilistic consistency-based multiple sequence alignment. *Genome Research* 15: 330–340.
- Thompson JD, Higgins DG, Gibson TJ (1994) Clustal-W: Improving the sensitivity of progressive multiple sequence alignment through sequence weighting, position-specific gap penalties and weight matrix choice. *Nucleic Acids Research* 22: 4673–4680.
- Notredame C, Higgins DG, Heringa J (2000) T-Coffee: A novel method for fast and accurate multiple sequence alignment. *Journal of Molecular Biology* 302: 205–217.
- Penn O, Privman E, Ashkenazy H, Landan G, Graur D, et al. (2010) GUIDANCE: a web server for assessing alignment confidence scores. *Nucleic Acids Research* 38: W23–W28.
- Biegert A, Mayer C, Remmert M, Soding J, Lupas AN (2006) The MPI Bioinformatics Toolkit for protein sequence analysis. *Nucleic Acids Research* 34: W335–W339.
- Waterhouse AM, Procter JB, Martin DMA, Clamp M, Barton GJ (2009) Jalview Version 2 – a multiple sequence alignment editor and analysis workbench. *Bioinformatics* 25: 1189–1191.
- Procter JB, Thompson J, Letunic I, Creevey C, Jossinet F, et al. (2010) Visualization of multiple alignments, phylogenies and gene family evolution. *Nature Methods* 7: S16–S25.
- Bailey TL, Boden M, Buske FA, Frith M, Grant CE, et al. (2009) MEME SUITE: tools for motif discovery and searching. *Nucleic Acids Research* 37: W202–W208.
- Neduvu V, Russell RB (2006) DILIMOT: discovery of linear motifs in proteins. *Nucleic Acids Research* 34: W350–W355.
- Davey NE, Haslam NJ, Shields DC, Edwards RJ (2010) SLiMfinder: a web server to find novel, significantly over-represented, short protein motifs. *Nucleic Acids Research* 38: W534–W539.
- Moretti S, Reinier F, Poirot O, Armougou F, Audic S, et al. (2006) PROTOGENE: turning amino acid alignments into bona fide CDS nucleotide alignments. *Nucleic Acids Research* 34: W600–W603.
- Torarinsson E, Lindgreen S (2008) WAR: Webserver for aligning structural RNAs. *Nucleic Acids Research* 36: W79–W84.
- Cole C, Barber JD, Barton GJ (2008) The Jpred 3 secondary structure prediction server. *Nucleic Acids Research* 36: W197–W201.
- Lieutaud P, Canard B, Longhi S (2008) MeDo: a metasever for predicting protein disorder. *BMC Genomics* 9: S25. doi:10.1186/1471-2164-9-S2-S25.
- Ferron F, Longhi S, Canard B, Karlin D (2006) A practical overview of protein disorder prediction methods. *Proteins* 65: 1–14.
- Vacic V, Uversky VN, Dunker AK, Lonardi S (2007) Composition Profiler: a tool for discovery and visualization of amino acid composition differences. *BMC Bioinformatics* 8: 211. doi:10.1186/1471-2105-8-211.
- Li T, Chen X, Garbutt KC, Zhou P, Zheng N (2006) Structure of DDB1 in complex with a paramyxovirus V protein: viral hijack of a propeller cluster in ubiquitin ligase. *Cell* 124: 105–117.
- Angers S, Li T, Yi X, MacCoss MJ, Moon RT, et al. (2006) Molecular architecture and assembly of the DDB1-CUL4A ubiquitin ligase machinery. *Nature* 443: 590–593.
- Ye Y, Godzik A (2004) FATCAT: a web server for flexible structure comparison and structure similarity searching. *Nucleic Acids Research* 32: W582–W585.
- Batts WN, Falk K, Winton JR (2008) Genetic analysis of paramyxovirus isolates from pacific salmon reveals two independently co-circulating lineages. *Journal of Aquatic Animal Health* 20: 215–224.
- Winton JR, Lannan CN, Ransom DP, Fryer JL (1985) Isolation of a new virus from chinook salmon (*Oncorhynchus tshawytscha*) in Oregon, USA. *Fish Pathology* 20: 373–380.
- Woo PC, Lau SK, Wong BH, Wong AY, Poon RW, et al. (2011) Complete genome sequence of a novel paramyxovirus, taillam virus, discovered in sikkim rats. *Journal of Virology* 85: 13473–13474.
- Li T, Robert EI, van Breugel PC, Strubin M, Zheng N (2010) A promiscuous alpha-helical motif anchors viral hijackers and substrate receptors to the

- CUL4-DDB1 ubiquitin ligase machinery. *Nature Structural & Molecular Biology* 17: 105–111.
50. Peeters B, Verbruggen P, Nelissen F, de Leeuw O (2004) The P gene of Newcastle disease virus does not encode an accessory X protein. *Journal of General Virology* 85: 2375–2378.
  51. Lamb RA, Parks GD (2007) Paramyxoviridae: the viruses and their replication. In: Knipe DM, Howley PM, eds. *Fields Virology*. Fifth edition ed. Philadelphia: Lippincott Williams & Wilkins. pp 1449–1496.
  52. Bernhart SH, Hofacker IL (2009) From consensus structure prediction to RNA gene finding. *Briefings in Functional Genomics* 8: 461–471.
  53. Meszaros B, Tompa P, Simon I, Dosztanyi Z (2007) Molecular principles of the interactions of disordered proteins. *Journal of Molecular Biology* 372: 549–561.
  54. Vacic V, Oldfield CJ, Mohan A, Radivojac P, Cortese MS, et al. (2007) Characterization of molecular recognition features, MoRFs, and their binding partners. *Journal of Proteome Research* 6: 2351–2366.
  55. Curran J, Marq JB, Kolakofsky D (1995) An N-terminal domain of the Sendai paramyxovirus P protein acts as a chaperone for the NP protein during the nascent chain assembly step of genome replication. *Journal of Virology* 69: 849–855.
  56. Witko SE, Kotash C, Sidhu MS, Udem SA, Parks CL (2006) Inhibition of measles virus minireplicon-encoded reporter gene expression by V protein. *Virology* 348: 107–119.
  57. Negrodo A, Palacios G, Vazquez-Moron S, Gonzalez F, Dopazo H, et al. (2011) Discovery of an ebolavirus-like filovirus in europe. *PLoS Pathogens* 7: e1002304.
  58. Leyrat C, Yabukarski F, Tarbouriech N, Ribeiro EA, Jr., Jensen MR, et al. (2011) Structure of the vesicular stomatitis virus N-p complex. *PLoS Pathogens* 7: e1002248.
  59. Chen M, Ogino T, Banerjee AK (2007) Interaction of vesicular stomatitis virus P and N proteins: identification of two overlapping domains at the N terminus of P that are involved in N<sup>o</sup>-P complex formation and encapsidation of viral genome RNA. *Journal of Virology* 81: 13478–13485.
  60. Mavrakīs M, Mehous S, Real E, Iseni F, Blondel D, et al. (2006) Rabies virus chaperone: identification of the phosphoprotein peptide that keeps nucleoprotein soluble and free from non-specific RNA. *Virology* 349: 422–429.
  61. Ivanov I, Crepin T, Jamin M, Ruigrok RW (2010) Structure of the dimerization domain of the rabies virus phosphoprotein. *Journal of Virology* 84: 3707–3710.
  62. Ding H, Green TJ, Lu S, Luo M (2006) Crystal structure of the oligomerization domain of the phosphoprotein of vesicular stomatitis virus. *Journal of Virology* 80: 2808–2814.
  63. Tarbouriech N, Curran J, Ruigrok RW, Burmeister WP (2000) Tetrameric coiled coil domain of Sendai virus phosphoprotein. *Nature Structural & Molecular Biology* 7: 777–781.
  64. Johansson K, Bourhis JM, Campanacci V, Cambillau C, Canard B, et al. (2003) Crystal structure of the measles virus phosphoprotein domain responsible for the induced folding of the C-terminal domain of the nucleoprotein. *Journal of Biological Chemistry* 278: 44567–44573.
  65. Kingston RL, Gay LS, Baase WS, Matthews BW (2008) Structure of the nucleocapsid-binding domain from the mumps virus polymerase; an example of protein folding induced by crystallization. *Journal of Molecular Biology* 379: 719–731.
  66. Blanchard L, Tarbouriech N, Blackledge M, Timmins P, Burmeister WP, et al. (2004) Structure and dynamics of the nucleocapsid-binding domain of the Sendai virus phosphoprotein in solution. *Virology* 319: 201–211.
  67. Ribeiro EA, Jr., Favier A, Gerard FC, Leyrat C, Brutscher B, et al. (2008) Solution structure of the C-terminal nucleoprotein-RNA binding domain of the vesicular stomatitis virus phosphoprotein. *Journal of Molecular Biology* 382: 525–538.
  68. Mavrakīs M, McCarthy AA, Roche S, Blondel D, Ruigrok RW (2004) Structure and function of the C-terminal domain of the polymerase cofactor of rabies virus. *Journal of Molecular Biology* 343: 819–831.
  69. Leung DW, Ginder ND, Fulton DB, Nix J, Basler CF, et al. (2009) Structure of the Ebola VP35 interferon inhibitory domain. *Proceedings of the National Academy of Sciences of the United States of America* 106: 411–416.
  70. Assenberg R, Delmas O, Ren J, Vidalain PO, Verma A, et al. (2010) Structure of the nucleoprotein binding domain of Mokola virus phosphoprotein. *Journal of Virology* 84: 1089–1096.
  71. McCarthy AJ, Goodman SJ (2010) Reassessing conflicting evolutionary histories of the Paramyxoviridae and the origins of respiroviruses with Bayesian multigene phylogenies. *Infection, Genetics and Evolution* 10: 97–107.
  72. Davey NE, Trave G, Gibson TJ (2011) How viruses hijack cell regulation. *Trends in Biochemical Sciences* 36: 159–169.
  73. Vidalain PO, Tangy F (2010) Virus-host protein interactions in RNA viruses. *Microbes and Infection* 12: 1134–1143.
  74. Precious B, Young DF, Birmingham A, Fearn R, Ryan M, et al. (1995) Inducible expression of the P, V, and NP genes of the paramyxovirus simian virus 5 in cell lines and an examination of NP-P and NP-V interactions. *Journal of Virology* 69: 8001–8010.
  75. Nishio M, Tsurudome M, Ito M, Ito Y (2005) Human parainfluenza virus type 4 is incapable of evading the interferon-induced antiviral effect. *Journal of Virology* 79: 14756–14768.
  76. Horvath CM (2004) Weapons of STAT destruction – Interferon evasion by paramyxovirus V proteins. *European Journal of Biochemistry* 271: 4621–4628.
  77. Chatziandreu N, Young D, Andrejeva J, Goodbourn S, Randall RE (2002) Differences in interferon sensitivity and biological properties of two related isolates of simian virus 5: A model for virus persistence. *Virology* 293: 234–242.
  78. Ciancanelli MJ, Volchkova VA, Shaw ML, Volchkov VE, Basler CF (2009) Nipah virus sequesters inactive STAT1 in the nucleus via a P gene-encoded mechanism. *Journal of Virology* 83: 7828–7841.
  79. Rodriguez JJ, Wang LF, Horvath CM (2003) Hendra virus V protein inhibits interferon signaling by preventing STAT1 and STAT2 nuclear accumulation. *Journal of Virology* 77: 11842–11845.
  80. Huang ZH, Krishnamurthy S, Panda A, Samal SK (2003) Newcastle disease virus V protein is associated with viral pathogenesis and functions as an alpha interferon antagonist. *Journal of Virology* 77: 8676–8685.
  81. Dortmans JCFM, Rottier PJJ, Koch G, Peeters BPH (2011) Passaging of a Newcastle disease virus pigeon variant in chickens results in selection of viruses with mutations in the polymerase complex enhancing virus replication and virulence. *Journal of General Virology* 92: 336–345.
  82. Prins KC, Binning JM, Shabman RS, Leung DW, Amarasinghe GK, et al. (2010) Basic residues within the ebolavirus VP35 protein are required for its viral polymerase cofactor function. *Journal of Virology* 84: 10581–10591.
  83. Longhi S, Receveur-Brechot V, Karlin D, Johansson K, Darbon H, et al. (2003) The C-terminal domain of the measles virus nucleoprotein is intrinsically disordered and folds upon binding to the C-terminal moiety of the phosphoprotein. *Journal of Biological Chemistry* 278: 18638–18648.
  84. Schneider G, Neuberger G, Wildpaner M, Tian S, Berezovsky I, et al. (2006) Application of a sensitive collection heuristic for very large protein families: Evolutionary relationship between adipose triglyceride lipase (ATGL) and classic mammalian lipases. *BMC Bioinformatics* 7: 164. doi: 10.1186/1471-2105-7-164.
  85. Goncarenco A, Berezovsky IN (2010) Prototypes of elementary functional loops unravel evolutionary connections between protein functions. *Bioinformatics* 26: i497–i503.
  86. Noda T, Hagiwara K, Sagara H, Kawaoka Y (2010) Characterization of the Ebola virus nucleoprotein-RNA complex. *Journal of General Virology* 91: 1478–1483.
  87. Kolesnikova L, Muhlberger E, Ryabchikova E, Becker S (2000) Ultrastructural organization of recombinant Marburg virus nucleoprotein: Comparison with Marburg virus inclusions. *Journal of Virology* 74: 3899–3904.
  88. Bhella D, Ralph A, Murphy LB, Yeo RP (2002) Significant differences in nucleocapsid morphology within the Paramyxoviridae. *Journal of General Virology* 83: 1831–1839.
  89. Green TJ, Rowse M, Tsao J, Kang J, Ge P, et al. (2011) Access to RNA encapsidated in the nucleocapsid of vesicular stomatitis virus. *Journal of Virology* 85: 2714–2722.
  90. Hock M, Kraus I, Schoehn G, Jamin M, Andrei-Selmer C, et al. (2010) RNA induced polymerization of the Borna disease virus nucleoprotein. *Virology* 397: 64–72.
  91. Schneider U (2005) Novel insights into the regulation of the viral polymerase complex of neurotropic Borna disease virus. *Virus Research* 111: 148–160.
  92. Tober C, Seufert M, Schneider H, Billeter MA, Johnston ICD, et al. (1998) Expression of measles virus V protein is associated with pathogenicity and control of viral RNA synthesis. *Journal of Virology* 72: 8124–8132.
  93. Shaji D, Shaila MS (1999) Domains of Rinderpest virus phosphoprotein involved in interaction with itself and the nucleocapsid protein. *Virology* 258: 415–424.
  94. Barr J, Easton AJ (1995) Characterisation of the interaction between the nucleoprotein and phosphoprotein of pneumonia virus of mice. *Virus Research* 39: 221–235.
  95. Tompa P, Fuxreiter M, Oldfield CJ, Simon I, Dunker AK, et al. (2009) Close encounters of the third kind: disordered domains and the interactions of proteins. *Bioessays* 31: 328–335.
  96. Pentony MM, Jones DT (2010) Modularity of intrinsic disorder in the human proteome. *Proteins: Structure Function and Bioinformatics* 78: 212–221.
  97. Dosztanyi Z, Meszaros B, Simon I (2010) Bioinformatical approaches to characterize intrinsically disordered/unstructured proteins. *Briefings in Bioinformatics* 11: 225–243.
  98. Diella F, Haslam N, Chica C, Budd A, Michael S, et al. (2008) Understanding eukaryotic linear motifs and their role in cell signaling and regulation. *Frontiers in Bioscience* 13: 6580–6603.
  99. Edwards RJ, Davey NE, O'Brien K, Shields DC (2012) Interactome-wide prediction of short, disordered protein interaction motifs in humans. *Molecular Biosystems* 8: 282–295.
  100. Thompson JD, Linard B, Lecompte O, Poch O (2011) A comprehensive benchmark study of multiple sequence alignment methods: current challenges and future perspectives. *PLoS ONE* 6: e18093.
  101. Brown CJ, Johnson AK, Daughdrill GW (2010) Comparing models of evolution for ordered and disordered proteins. *Molecular Biology and Evolution* 27: 609–621.
  102. Kuzniar A, van Ham RCHJ, Pongor S, Leunissen JAM (2008) The quest for orthologs: finding the corresponding gene across genomes. *Trends in Genetics* 24: 539–551.

103. Obayashi E, Yoshida H, Kawai F, Shibayama N, Kawaguchi A, et al. (2008) The structural basis for an essential subunit interaction in influenza virus RNA polymerase. *Nature* 454: 1127–1131.
104. He X, Zhou J, Bartlam M, Zhang R, Ma J, et al. (2008) Crystal structure of the polymerase PA(C)-PB1(N) complex from an avian influenza H5N1 virus. *Nature* 454: 1123–1126.
105. Sugiyama K, Obayashi E, Kawaguchi A, Suzuki Y, Tame JR, et al. (2009) Structural insight into the essential PB1–PB2 subunit contact of the influenza virus RNA polymerase. *EMBO Journal* 28: 1803–1811.
106. Wunderlich K, Juozapaitis M, Ranadheera C, Kessler U, Martin A, et al. (2011) Identification of high-affinity PB1-derived peptides with enhanced affinity to the PA protein of influenza A virus polymerase. *Antimicrobial Agents and Chemotherapy* 55: 696–702.
107. Castel G, Chtecoui M, Caignard G, Prehaud C, Mehous S, et al. (2009) Peptides that mimic the amino-terminal end of the rabies virus phosphoprotein have antiviral activity. *Journal of Virology* 83: 10808–10820.
108. Chenik M, Schnell M, Conzelmann KK, Blondel D (1998) Mapping the interacting domains between the rabies virus polymerase and phosphoprotein. *Journal of Virology* 72: 1925–1930.
109. Watanabe N, Kawano M, Tsurudome M, Kusagawa S, Nishio M, et al. (1996) Identification of the sequences responsible for nuclear targeting of the V protein of human parainfluenza virus type 2. *Journal of General Virology* 77: 327–338.
110. Nishio M, Tsurudome M, Kawano M, Watanabe N, Ohgimoto S, et al. (1996) Interaction between nucleocapsid protein (NP) and phosphoprotein (P) of human parainfluenza virus type 2: one of the two NP binding sites on P is essential for granule formation. *Journal of General Virology* 77: 2457–2463.
111. Watanabe N, Kawano M, Tsurudome M, Nishio M, Ito M, et al. (1996) Binding of the V proteins to the nucleocapsid proteins of human parainfluenza type 2 virus. *Medical Microbiology & Immunology* 185: 89–94.
112. Randall RE, Bermingham A (1996) NP:P and NP:V interactions of the paramyxovirus simian virus 5 examined using a novel protein:protein capture assay. *Virology* 224: 121–129.
113. Guenzel CA (2009) PhD Thesis. The characterization of nipah virus V and W proteins. University of Wuerzburg.
114. Harty RN, Palese P (1995) Measles virus phosphoprotein (P) requires the NH<sub>2</sub>- and COOH-terminal domains for interactions with the nucleoprotein (N) but only the COOH terminus for interactions with itself. *Journal of General Virology* 76: 2863–2867.
115. De BP, Hoffman MA, Choudhary S, Huntley CC, Banerjee AK (2000) Role of NH<sub>2</sub>- and COOH-terminal domains of the P protein of human parainfluenza virus type 3 in transcription and replication. *Journal of Virology* 74: 5886–5895.
116. Baker KS, Todd S, Marsh G, Fernandez-Loras A, Suu-Ire R, Wood JLN, Wang LF, Murcia PR, Cunningham AA (2012) Co-circulation of diverse paramyxoviruses in an urban African fruit bat population. *Journal of General Virology*(in press).
